# Supplementary material for: Predictable decadal forcing of the North Atlantic jet speed by sub-polar North Atlantic sea surface temperatures
Source: Copernicus journal article supplement (doi:10.5194/wcd-4-853-2023), 2023-10-09
Supplement: Supplementary file 1 [file wcd-4-853-2023-supplement.pdf]

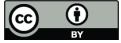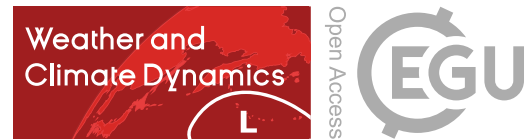

*Supplement of*

## **Predictable decadal forcing of the North Atlantic jet speed by sub-polar North Atlantic sea surface temperatures**

**Kristian Strommen et al.**

*Correspondence to:* Kristian Strommen ([kristian.strommen@physics.ox.ac.uk](mailto:kristian.strommen@physics.ox.ac.uk))

The copyright of individual parts of the supplement might differ from the article licence.

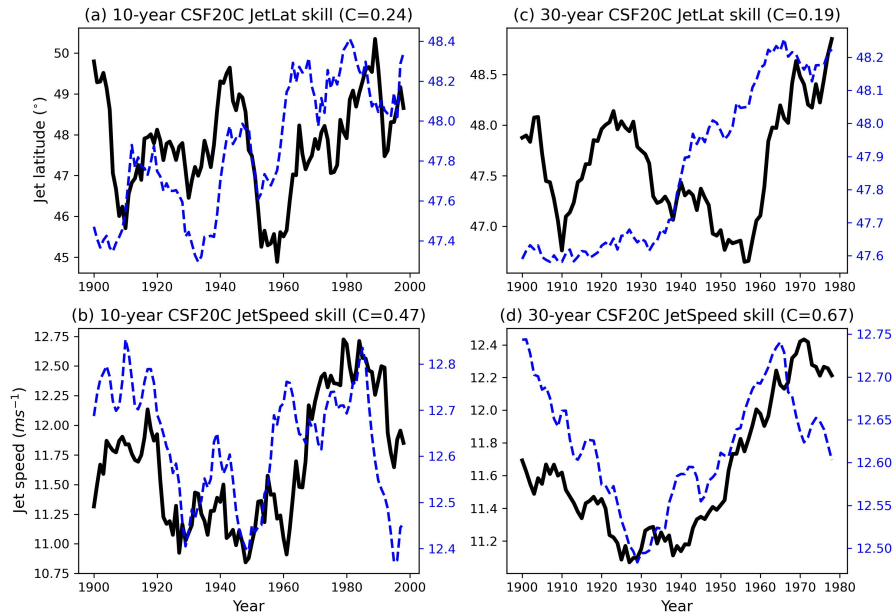

**Figure S1.** Timeseries of 10-year running DJF means of (a) the jet latitude, and (b) the jet speed. The same but with 30-year running means in (c) and (d). The thick black curves are always ERA20C and the dashed blue curves are always the CSF20C ensemble mean. Note the different *y*-axes for the black and blue curves. The value *C* in each subplot is the correlation between the two timeseries.

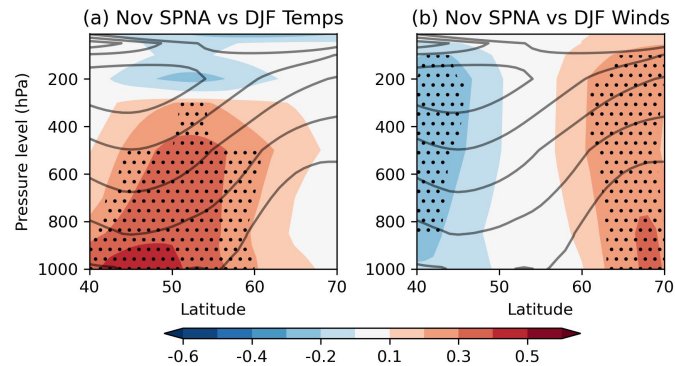

**Figure S2.** Correlations in ERA20C between November SPNA SSTs and (a) DJF zonally averaged air temperatures at different pressure levels; (b) DJF zonally averaged zonal winds at different pressure levels. The period 1900-2010 is used. The climatological zonal winds are shown in grey contours. Stippling indicates significance ( $p = 5\%$ ) with respect to a null hypothesis where the SPNA is modelled using the Fourier phase shuffle method and winds/temperatures as white noise.

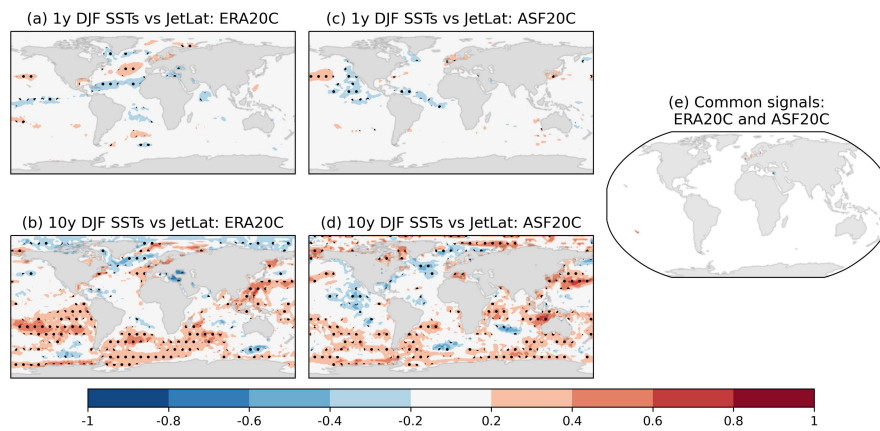

**Figure S3.** Correlations between the DJF jet latitude timeseries and DJF SSTs at each gridpoint. In (a) for ERA20C using seasonal data; (b) for ERA20C with a 10-year running mean applied; (c) for ASF20C using seasonal data; (d) for ASF20C with a 10-year running mean applied. In (e) are shown the correlations from (b) that are common across all subplots and significant in each subplot by itself. Stippling indicates significance ( $p = 5\%$ ) using a two-tailed t-test. The period 1900-2010 is used.
